# Supplementary material
Source: publisher figshare collection journal article supplement (https://acs.figshare.com/ndownloader/files/21739260)
Supplement: Supplementary file 1 [file 21739260]

1    **Appendix: Supporting Information**

2    **Efficient Removal of Sulfur Dioxide from Flue Gas**  
3    **through Liquid Catalytic Oxidation Using Copper**  
4    **Tailing as the *in situ* Iron Ion Donator**

5    *Lei Tao, Xueqian Wang \*, Langlang Wang, Yixing Ma, Yingjie Zhang, Ping Ning*  
6  
7

8    Faculty of Environmental Science and Engineering, Kunming University of Science  
9    and Technology, Kunming 650500, China  
10  
11  
12  
13  
14

15    **Figure S1.** A copper pyrometallurgical process from Cu-Fe-S ores.

16    **Figure S2.** FT-IR spectra of raw and spent copper tailings.

17    **Figure S3.** SEM/EDS images of raw and spent copper tailing.  
18

---

\*Corresponding author:

E-mail: wxq3000@aliyun.com. Tel/Fax: +86 13888183303.

# 1 Copper pyrometallurgical process

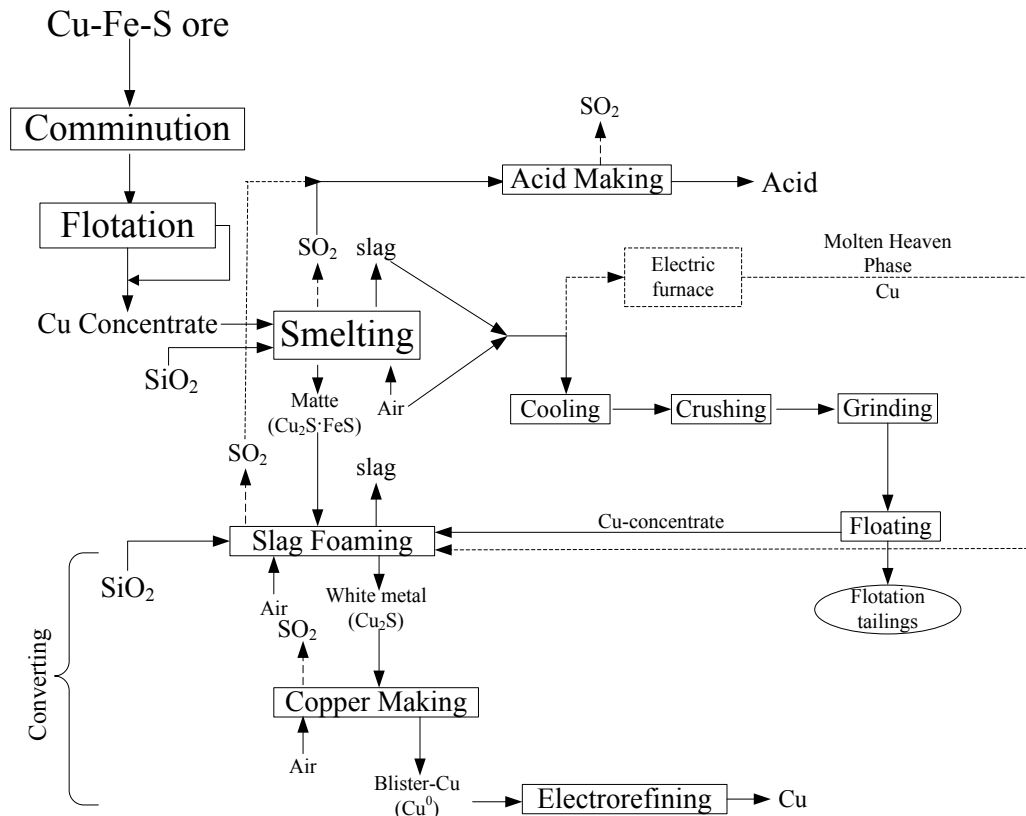

**Fig. S1.** A copper pyrometallurgical process from Cu-Fe-S ores [1].

## Reference

[1] F. Carranza, N. Iglesias, A. Mazuelos, R. Romero, O. Forcat, Ferric leaching of copper slag flotation tailings, Minerals Engineering, 22(2009) 107-110.

## FT-IR spectroscopy

The functional groups of the samples were identified using Fourier-transform infrared spectrometer (FTIR, Bruker Vertex 70). The FT-IR patterns of the copper tailing and the spent copper tailing are shown in Figure S1. As shown in Figure S1, the absorption peaks at around  $1640\text{ cm}^{-1}$  are ascribed to O-H bending vibration, the absorption peaks at around  $1097\text{ cm}^{-1}$  are ascribed to the symmetrical stretching vibration of Si-O-Si, and the FT-IR bands at about  $798$  and  $467\text{ cm}^{-1}$  are ascribed to the symmetrical stretching vibration of Si-O bonds<sup>11,22</sup>. Combined with the raw and spent copper tailing, the intensity of Si-O stretching vibration weakened slightly, other main absorption peaks remained almost identical, confirming that the dissolution of  $\text{Fe}_2\text{SiO}_4$  and the main structure of copper tailing was stable during the flue gas desulfurization process.

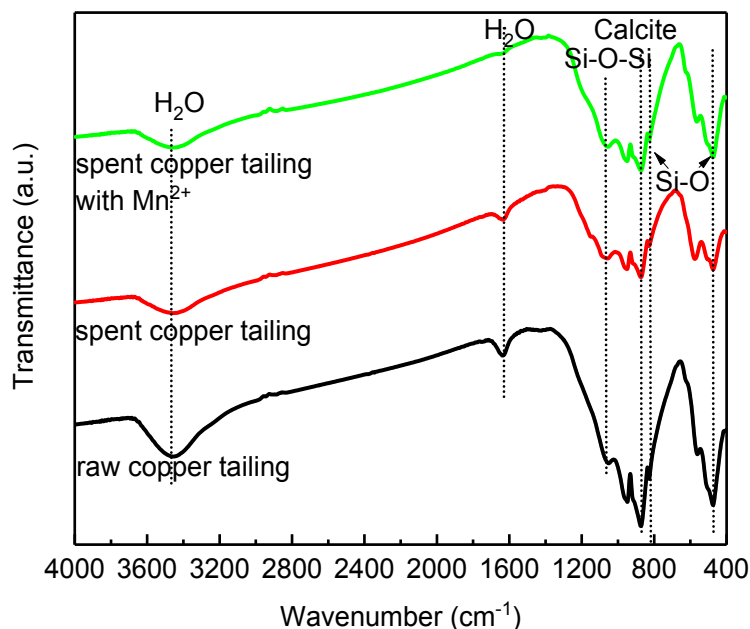

**Figure S2.** FT-IR spectra of raw and spent copper tailings.

1 SEM-EDS

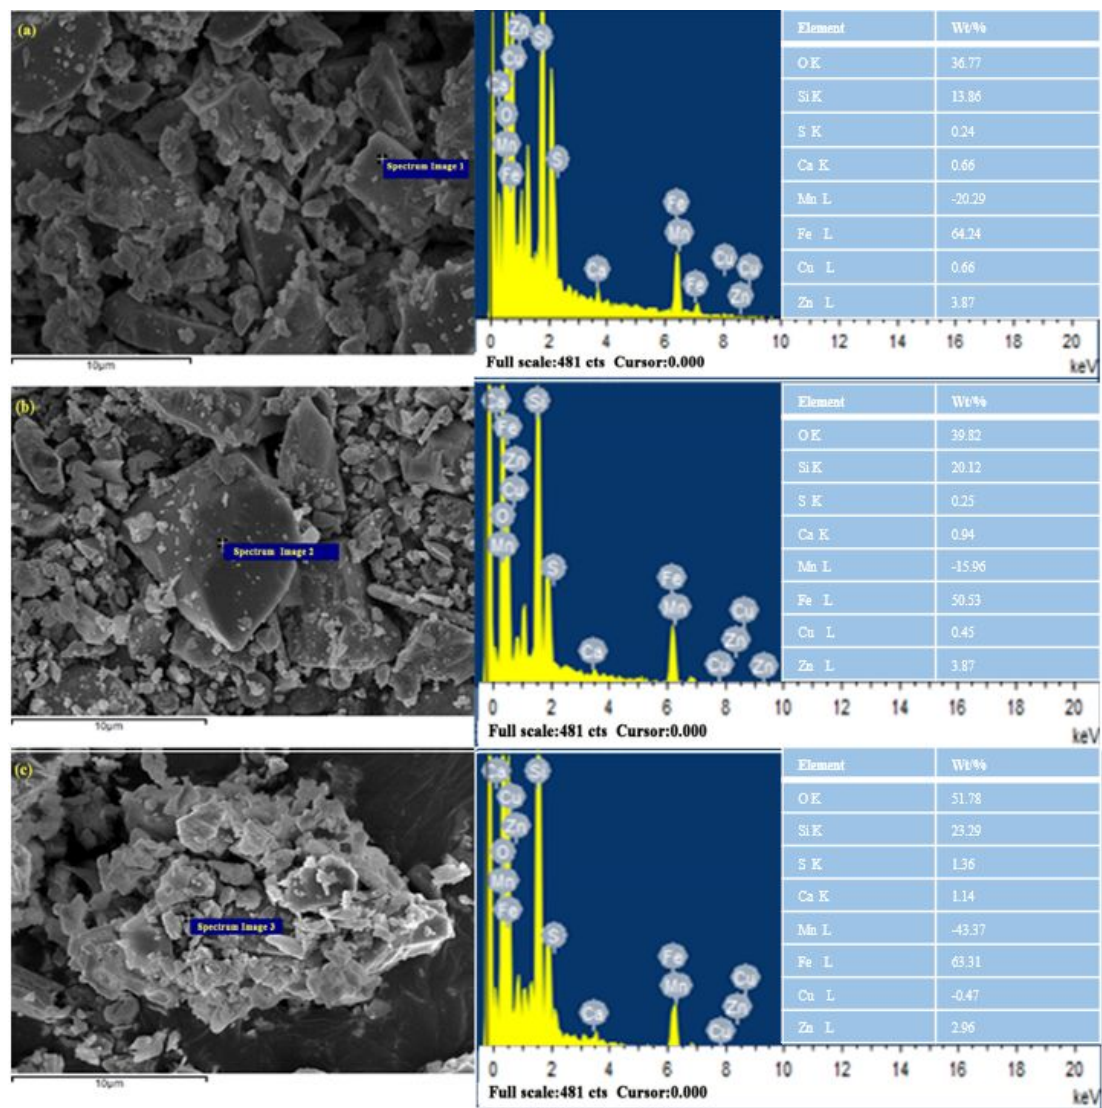

2  
3 **Figure S3.** SEM/EDS images of raw and spent copper tailing. (a) raw copper tailing,  
4 (b) spent copper tailing after 10 h flue gas desulfurization, and (c) spent copper tailing  
5 combined with  $Mn^{2+}$  after 10 h flue gas desulfurization.
